# Supplementary material for: Effect of TiO2 support on the structural and electronic properties of PdmAgn clusters: a first-principles study
Source: Royal Society of Chemistry journal article supplement (doi:10.1039/c2cp40562h), 2012-01-01
Supplement: c2cp40562h.pdf [file c2cp40562h.pdf]

## Supporting Information

Table S1 Mulliken charges of each metal atoms in the most stable structures of adsorbed pure Ag<sub>n</sub> and pure Pd<sub>n</sub> clusters at the perfect and defective anatase TiO<sub>2</sub>(101) surfaces.

|           | Atoms in clusters |       |       |       |       |                  |       |      |      |      |      |                  |      |
|-----------|-------------------|-------|-------|-------|-------|------------------|-------|------|------|------|------|------------------|------|
|           | Pd1               | Pd2   | Pd3   | Pd4   | Pd5   | sum <sup>a</sup> | Ag1   | Ag2  | Ag3  | Ag4  | Ag5  | sum <sup>b</sup> |      |
| Perfect   | Pd <sub>1</sub>   | 0.09  |       |       |       |                  | 0.09  |      |      |      |      |                  |      |
|           | Pd <sub>2</sub>   | 0.16  | 0.09  |       |       |                  | 0.25  |      |      |      |      |                  |      |
|           | Pd <sub>3</sub>   | 0.11  | 0.13  | 0.12  |       |                  | 0.36  |      |      |      |      |                  |      |
|           | Pd <sub>4</sub>   | 0.1   | 0.16  | 0.1   | -0.27 |                  | 0.09  |      |      |      |      |                  |      |
|           | Pd <sub>5</sub>   | 0.01  | -0.03 | 0.05  | -0.16 | 0.24             | 0.11  |      |      |      |      |                  |      |
|           | Ag <sub>1</sub>   |       |       |       |       |                  |       | 0.58 |      |      |      |                  | 0.58 |
|           | Ag <sub>2</sub>   |       |       |       |       |                  |       | 0.22 | 0.05 |      |      |                  | 0.27 |
|           | Ag <sub>3</sub>   |       |       |       |       |                  |       | 0.21 | 0.21 | 0.09 |      |                  | 0.51 |
|           | Ag <sub>4</sub>   |       |       |       |       |                  |       | 0.3  | 0.3  | 0.27 | 0.07 |                  | 0.94 |
|           | Ag <sub>5</sub>   |       |       |       |       |                  |       | 0.09 | 0.14 | 0.15 | 0.05 | 0.19             | 0.62 |
| Defective | Pd <sub>1</sub>   | -0.18 |       |       |       |                  | -0.18 |      |      |      |      |                  |      |
|           | Pd <sub>2</sub>   | -0.03 | -0.03 |       |       |                  | -0.06 |      |      |      |      |                  |      |
|           | Pd <sub>3</sub>   | 0.07  | 0.07  | -0.14 |       |                  | 0     |      |      |      |      |                  |      |
|           | Pd <sub>4</sub>   | -0.18 | -0.05 | -0.05 | -0.12 |                  | -0.4  |      |      |      |      |                  |      |
|           | Pd <sub>5</sub>   | -0.17 | -0.04 | -0.03 | 0     | -0.13            | -0.37 |      |      |      |      |                  |      |
|           | Ag <sub>1</sub>   |       |       |       |       |                  |       | 0.05 |      |      |      |                  | 0.05 |
|           | Ag <sub>2</sub>   |       |       |       |       |                  |       | 0.16 | 0.16 |      |      |                  | 0.32 |
|           | Ag <sub>3</sub>   |       |       |       |       |                  |       | 0.16 | 0.16 | 0.12 |      |                  | 0.44 |
|           | Ag <sub>4</sub>   |       |       |       |       |                  |       | 0.13 | 0.13 | 0.12 | 0.04 |                  | 0.42 |
|           | Ag <sub>5</sub>   |       |       |       |       |                  |       | 0.01 | 0.14 | 0.14 | 0.03 | 0.06             | 0.38 |

<sup>a</sup> the total charge of adsorbed Pd<sub>n</sub> cluster.

<sup>b</sup> the total charge of adsorbed Ag<sub>n</sub> cluster.

Table S2 Mulliken charges of each metal atoms in the most stable structures of adsorbed pure Ag<sub>1</sub> and Pd<sub>1</sub>Ag<sub>1</sub> dimer at perfect and defective anatase TiO<sub>2</sub>(101) surfaces by GGA (GGA+U) calculation.

|                                 | Perfect       |             |              | Defective     |             |              |
|---------------------------------|---------------|-------------|--------------|---------------|-------------|--------------|
|                                 | Pd1           | Ag1         | total charge | Pd1           | Ag1         | total charge |
| Ag <sub>1</sub>                 | -             | 0.58 (0.55) | 0.58 (0.55)  | -             | 0.05 (0.08) | 0.05 (0.08)  |
| Pd <sub>1</sub> Ag <sub>1</sub> | -0.12 (-0.18) | 0.28 (0.24) | 0.16 (0.06)  | -0.19 (-0.21) | 0.23 (0.26) | 0.04 (0.05)  |
